# Supplementary material
Source: PubMed Central journal article supplement (PMC3001347)
Supplement: NIHMS254163-supplement-Supp1.pdf [file NIHMS254163-supplement-Supp1.pdf]

## Dextran penetration in live injected fibers.

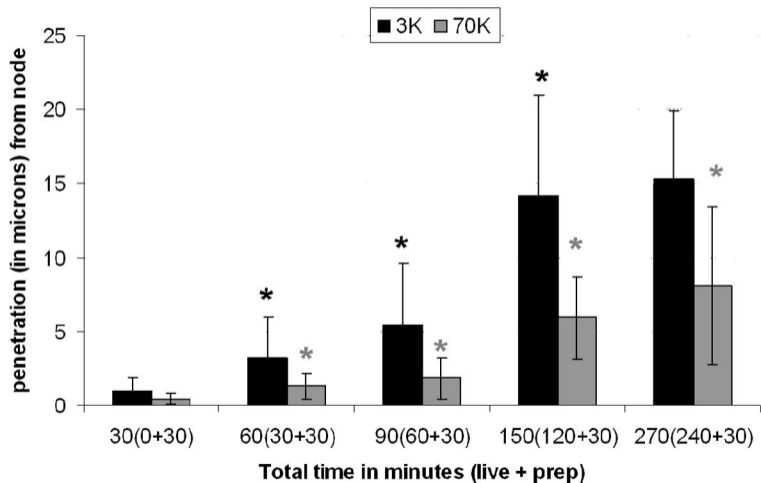

Supplementary Fig. S1. Dextran penetration is directly proportional to time. Tracer penetration, 3K (black) and 70K (gray), on each side of the node increases with increasing exposure. Each time point shows total time for penetration including, in parentheses, the 'live' time up to fixation plus 30min processing. In the '30 (0+30)' case, the nerve was fixed and processed immediately after tracer injection. The bars represent mean tracer penetration from at least 12 fibers per data point. Error bars represent standard deviation. Asterisks represent a significant increase from the preceding time point for each tracer ( $p < 0.05$ ; 1 tailed t-test).

Supplementary Table 1.  
**'Hits' per coverslip (fixed nerves).**

|     | mean #              | n  | p     |
|-----|---------------------|----|-------|
| 3K  | <b>181.7 ± 24.9</b> | 3  |       |
| 70K | <b>8.6 ± 7.1</b>    | 18 | 0.006 |

Supplementary Table S1. Number of fibers ( $\pm$  SD) per coverslip showing penetration of 3K or 70K dextran into paranodes ('hits') after a 2hr exposure to the tracer. (Fibers fixed in glutaraldehyde/formaldehyde prior to exposure; 2 tailed t-test).
